# Supplementary material for: Tetraspanin CD82 is necessary for muscle stem cell activation and supports dystrophic muscle function
Source: PubMed Central journal article supplement (PMC7693590; doi:10.1186/s13395-020-00252-3), 2020-11-27
Supplement: 13395_2020_252_MOESM6_ESM.pdf [file 13395_2020_252_MOESM6_ESM.pdf]

**Supplementary Table 1. List of primary antibodies used in this study.**

| <b>Antibody/name</b> | <b>Dilution</b> | <b>Item no.</b>          | <b>Company</b>          | <b>Application</b> |
|----------------------|-----------------|--------------------------|-------------------------|--------------------|
| Desmin               | 1:2000          | Ab8592                   | AbCam                   | Western blot       |
| CD82 (M35)           | 1:5000          | ENH036                   | Kerafast                | Western blot       |
| CD82                 | 1:100           | Ab66400                  | AbCam                   | IF                 |
| PTEN                 | 1:1000          | 9188                     | Cell Signaling          | Western blot       |
| pAKT(Ser473)         | 1:1000          | 4060                     | Cell Signaling          | Western blot       |
| AKT (total)          | 1:1000          | 2920                     | Cell Signaling          | Western blot       |
| mTOR2448             | 1:1000          | 5536                     | Cell Signaling          | Western blot       |
| mTOR (total)         | 1:1000          | 2972                     | Cell Signaling          | Western blot       |
| p-p70S6K             | 1:1000          | 9204                     | Cell Signaling          | Western blot       |
| p70S6K               | 1:1000          | 2708                     | Cell Signaling          | Western blot       |
| p4EBP1               | 1:1000          | 2855                     | Cell Signaling          | Western blot       |
| 4EBP1 (total)        | 1:1000          | 9644                     | Cell Signaling          | Western blot       |
| MyoD                 | 1:100           | Sc-760 (M318)            | Santa Cruz              | IF                 |
| MyoD                 | 1:100           | G1 (sc377460)            | Santa Cruz              | IF                 |
| Ki67                 | 1:500           | 9129S                    | CST                     | IF                 |
| H2A.X (S139)         | 1:400           | 2577S                    | CST                     | IF                 |
| Pax7                 | 1:200           | Concentrated supernatant | University of Iowa DSHB | IF                 |
| MF 20                | 1:50            | Concentrated supernatant | University of Iowa DSHB | IF                 |
